# Supplementary figures and images for: Estimate of the global burden of cervical adenocarcinoma and potential impact of prophylactic human papillomavirus vaccination
Source: Springer Nature journal article supplement (doi:10.1186/1471-2407-13-553), 2013-11-21

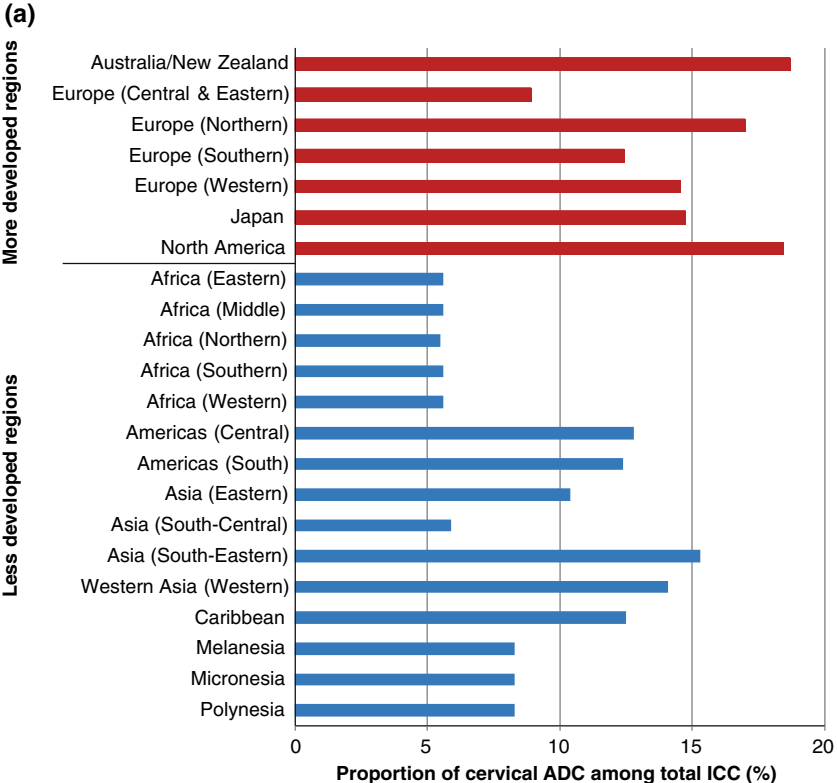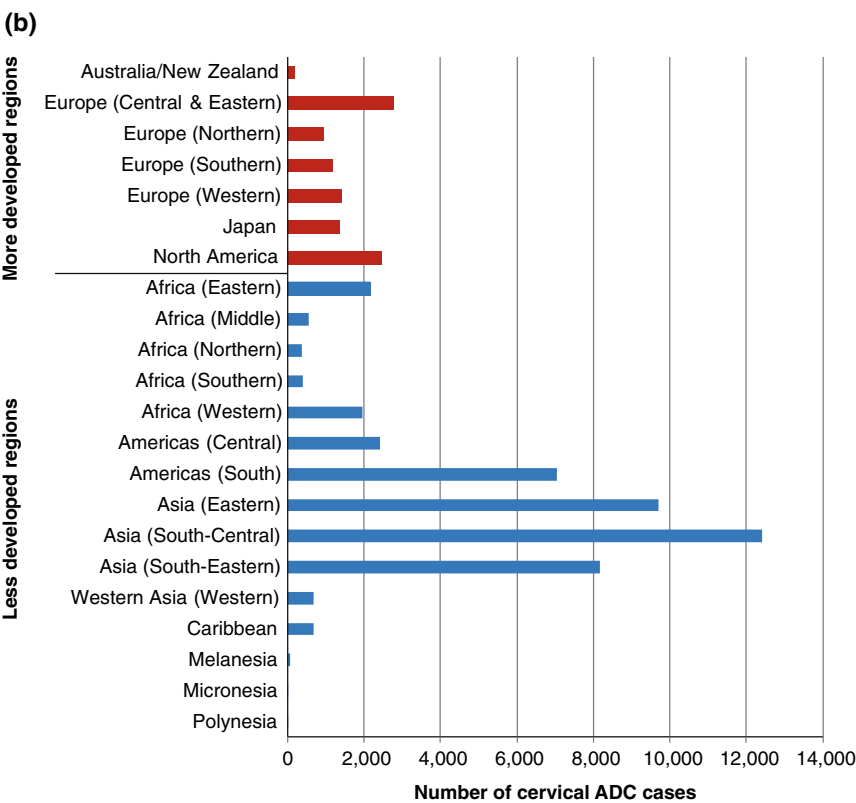

Supplement: 12885_2013_4172_MOESM1_ESM.pdf [file 12885_2013_4172_MOESM1_ESM.pdf]

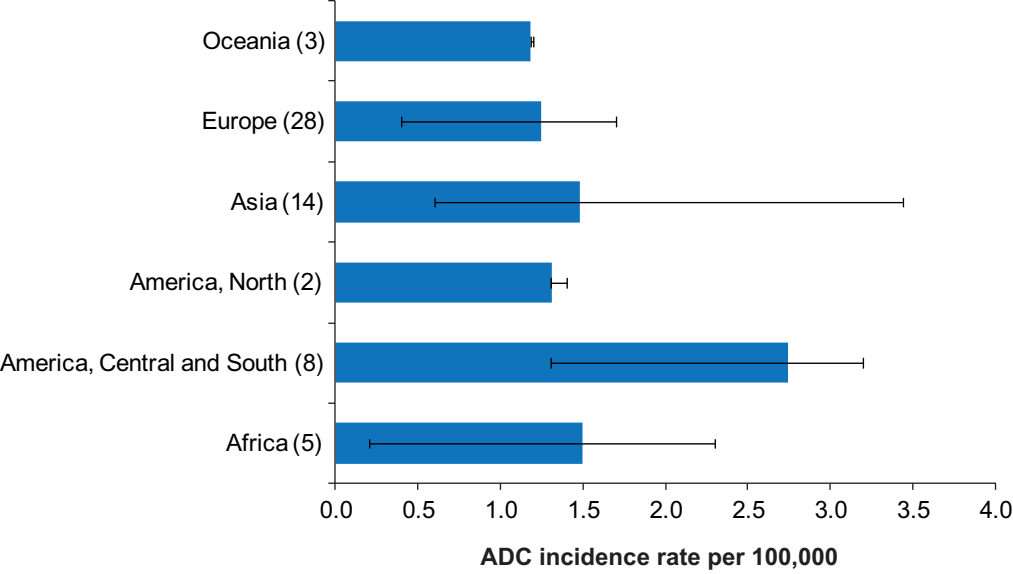

Supplement: 12885_2013_4172_MOESM2_ESM.pdf [file 12885_2013_4172_MOESM2_ESM.pdf]

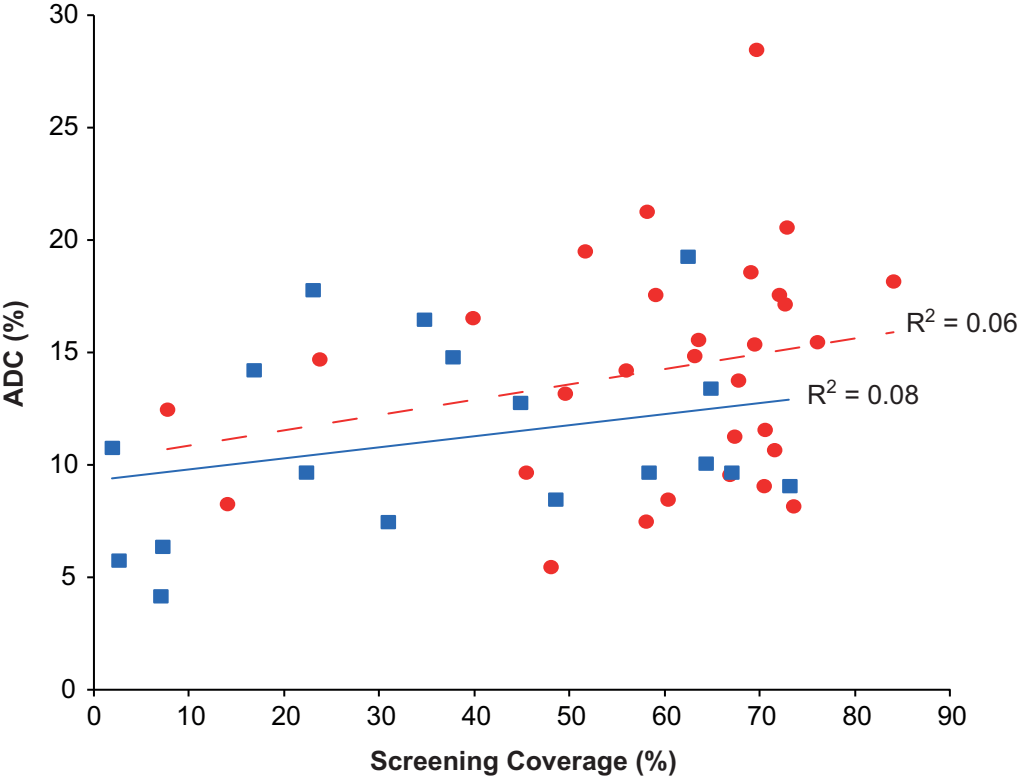

Supplement: 12885_2013_4172_MOESM3_ESM.pdf [file 12885_2013_4172_MOESM3_ESM.pdf]

**(a) Vaccine against:**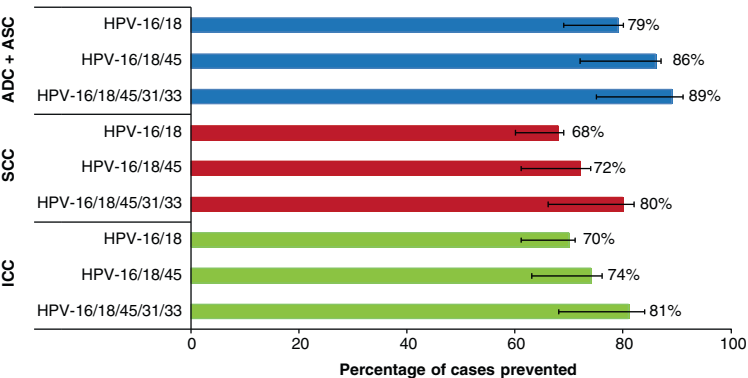**(b) Vaccine against:**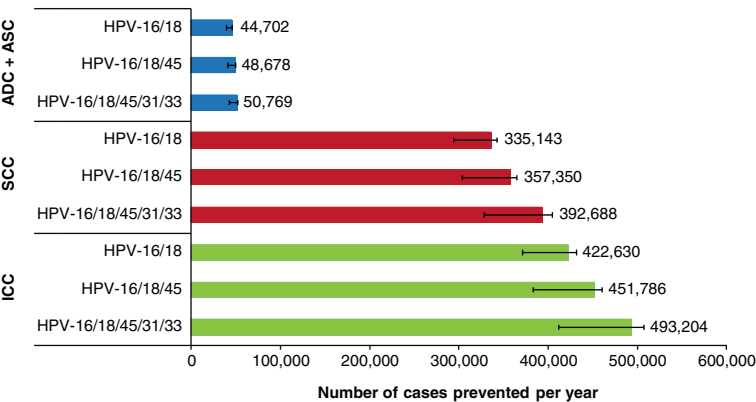

Supplement: 12885_2013_4172_MOESM4_ESM.pdf [file 12885_2013_4172_MOESM4_ESM.pdf]
